# Supplementary material
Source: PubMed Central journal article supplement (PMC5470412)
Supplement: jamapediatr-171-335-s001.pdf [file jamapediatr-171-335-s001.pdf]

## Supplementary Online Content

Blackburn J, Morrisey MA, Sen B. Outcomes associated with early preventive dental care among Medicaid-enrolled children in Alabama. *JAMA Pediatr*. Published online February 27, 2017. doi:10.1001/jamapediatrics.2016.4514

**eFigure 1.** Standardized Difference Plot for Dentist-delivered Preventive Dental Care

**eFigure 2.** Standardized Difference Plot for Primary Care Provider-Delivered Preventive Dental Care

**eFigure 3.** Standardized Difference Plot for Dentist-delivered High Frequency ( $\geq 4$  Visits) Preventive Dental Care

**eFigure 4.** Standardized Difference Plot for Primary Care Provider-delivered High Frequency ( $\geq 4$  Visits) Preventive Dental Care

**eTable 1.** Comparison of Propensity-score Matched Children Receiving High Frequency ( $\geq 4$  Visits) Dentist-delivered Preventive Dental Care and Those With 1-3 Visits

**eTable 2.** Comparison of Propensity-score Matched Children Receiving High Frequency ( $\geq 4$  Visits) Primary Care Provider-delivered Preventive Dental Care and Those With 1-3 Visits

This supplementary material has been provided by the authors to give readers additional information about their work.

**eFigure 1. Standardized Difference Plot for Dentist-delivered Preventive Dental Care**

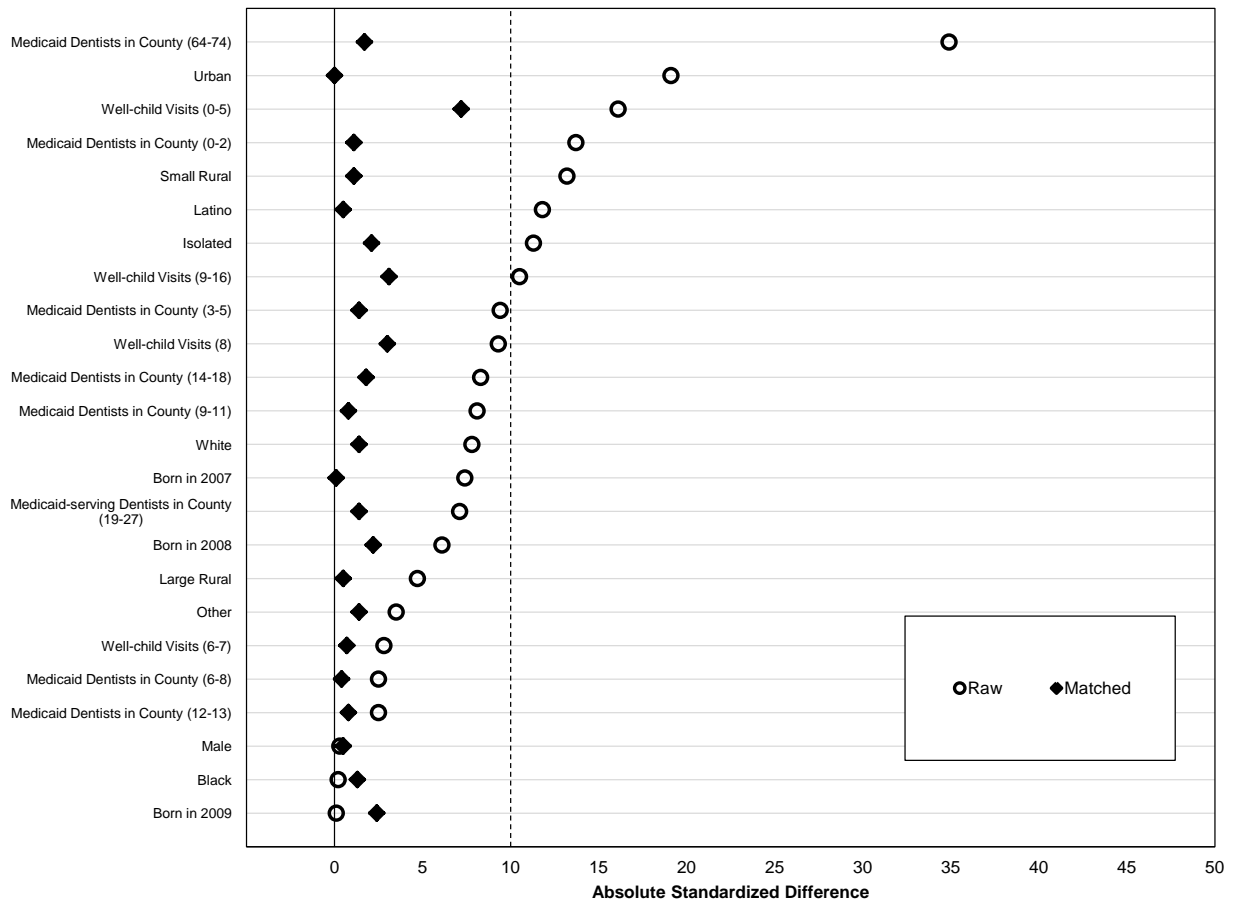

**eFigure 2. Standardized Difference Plot for Primary Care Provider-delivered Preventive Dental Care**

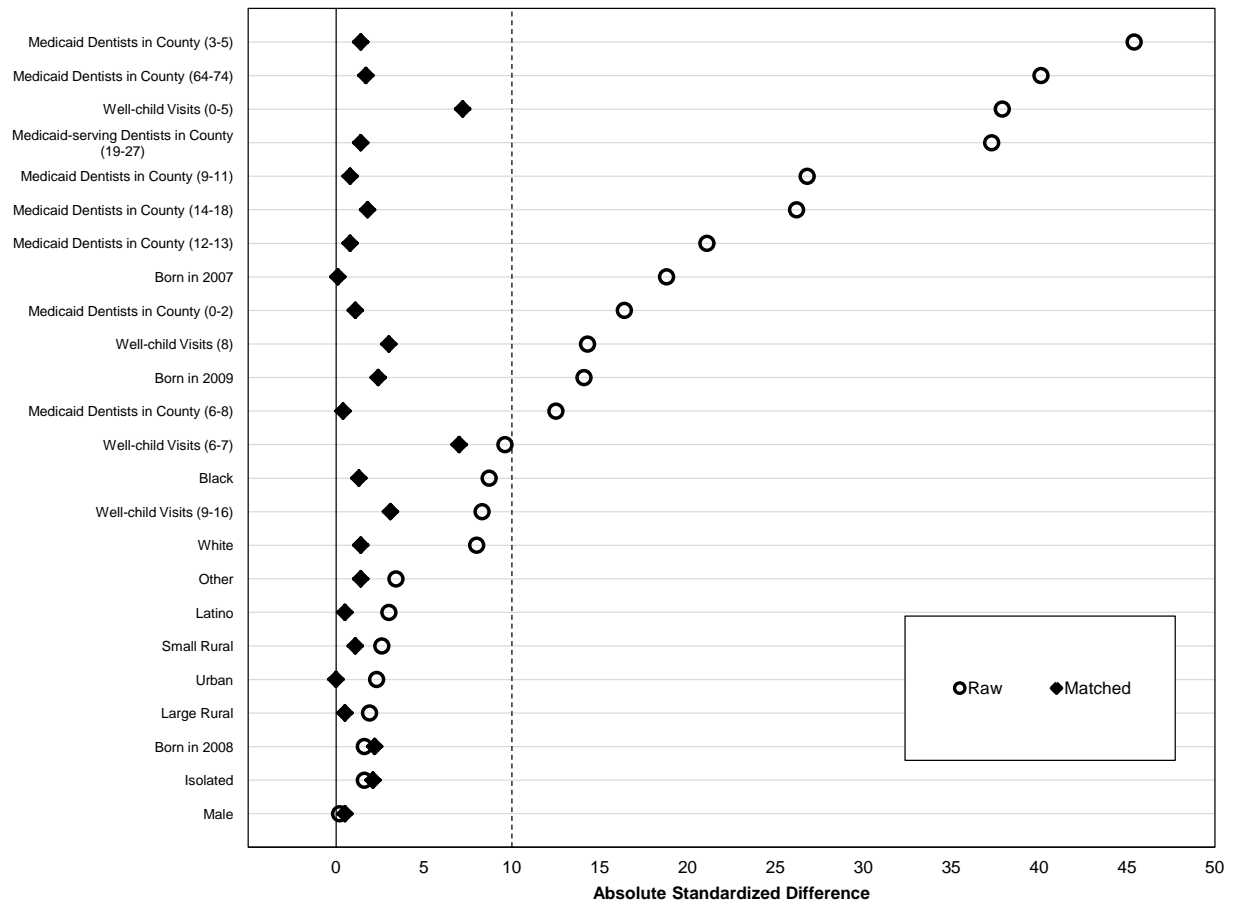

**eFigure 3. Standardized Difference Plot for Dentist-delivered High Frequency ( $\geq 4$  Visits) Preventive Dental Care**

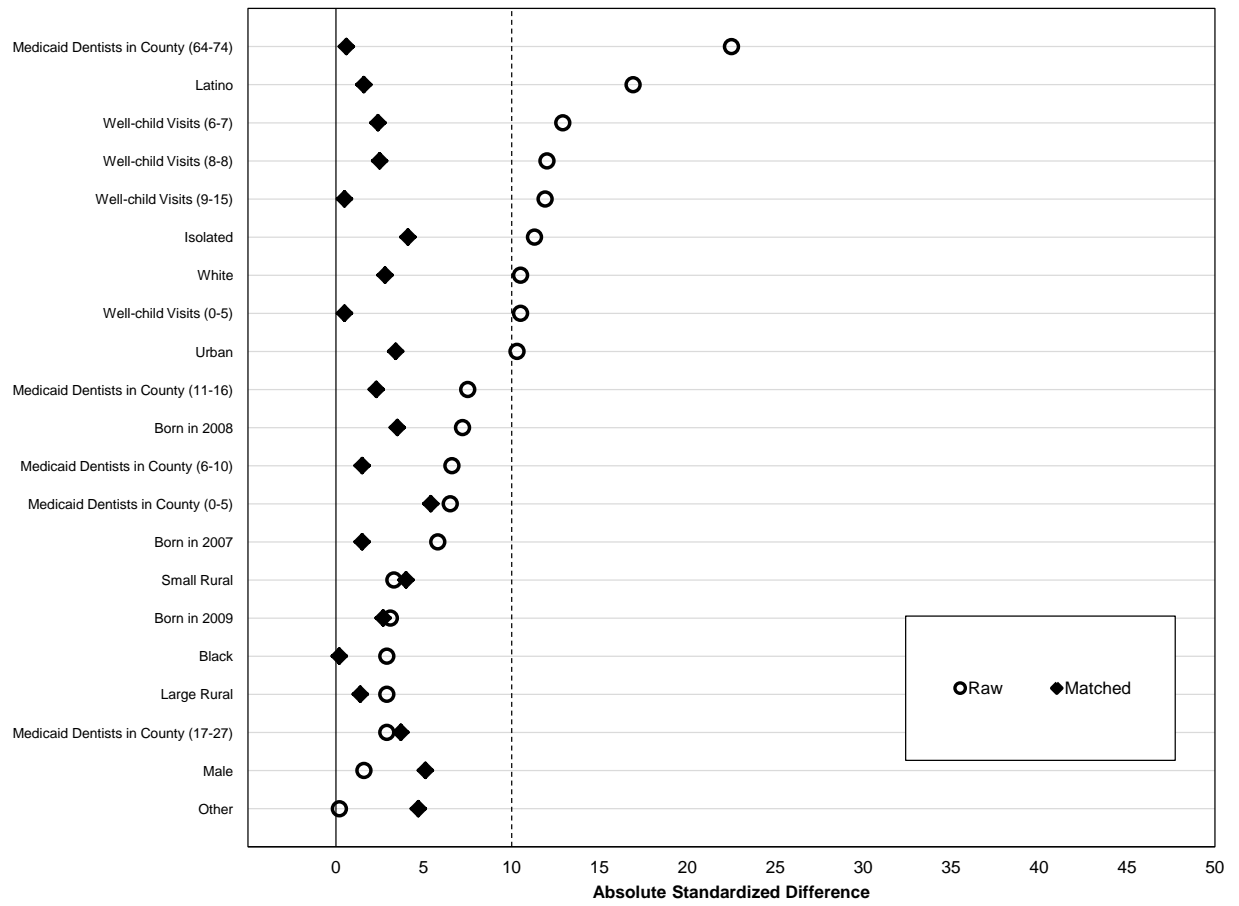

**eFigure 4. Standardized Difference Plot for Primary Care Provider-Delivered High Frequency ( $\geq 4$  Visits) Preventive Dental Care**

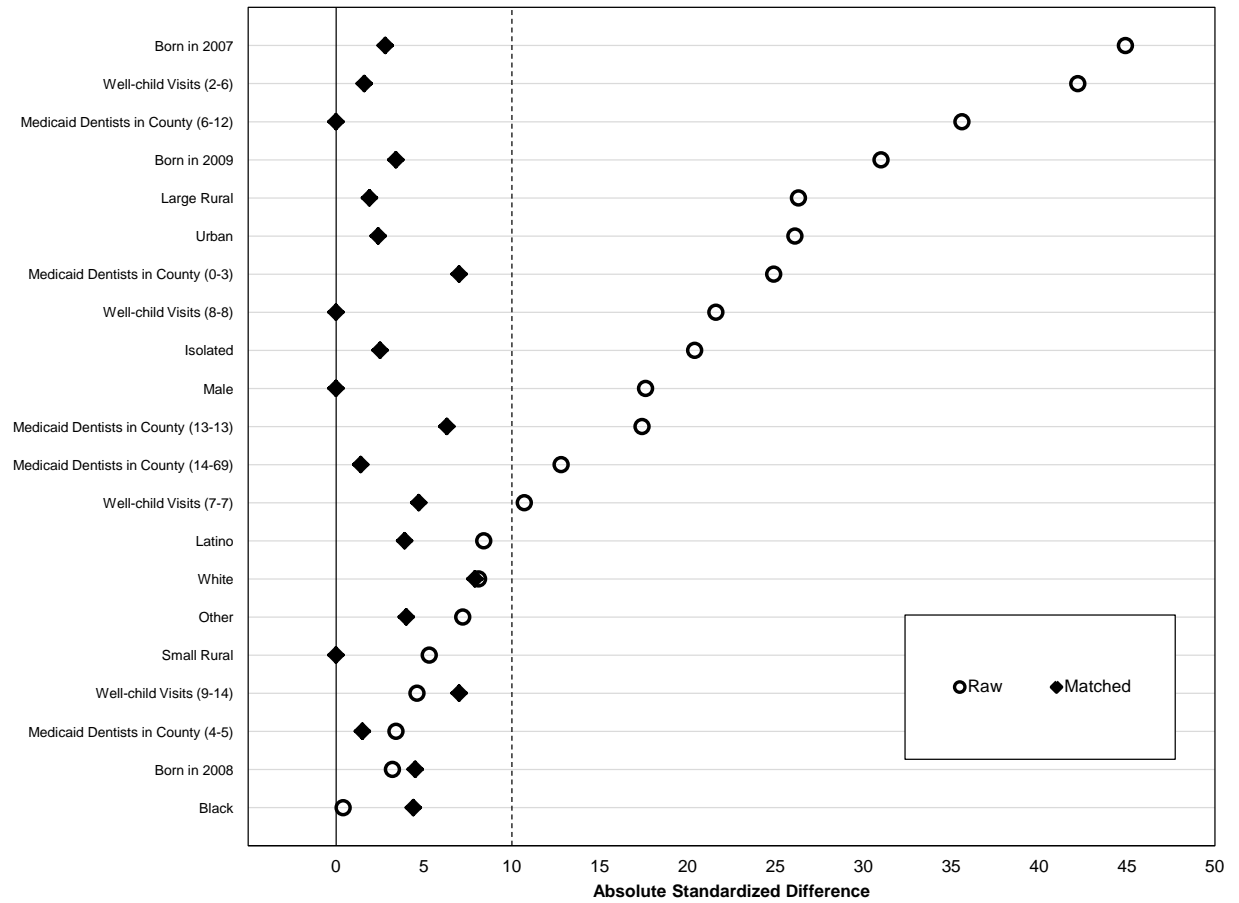

**eTable 1. Comparison of Propensity-score Matched Children Receiving High Frequency (≥4 Visits) Dentist-delivered Preventive Dental Care and Those With 1-3 Visits**

|                                                           | Dentist-delivered Care           |                                 |     |
|-----------------------------------------------------------|----------------------------------|---------------------------------|-----|
|                                                           | 1-3 Preventive Visits<br>n=1,051 | 4+ Preventive Visits<br>n=1,051 | SMD |
| <b>Male</b>                                               | 54.3%                            | 51.8%                           | 5.1 |
| <b>Race/Ethnicity</b>                                     |                                  |                                 |     |
| Black                                                     | 43.2%                            | 43.3%                           | 2.8 |
| White                                                     | 35.1%                            | 33.8%                           | 0.2 |
| Latino                                                    | 20.5%                            | 21.1%                           | 1.6 |
| Other                                                     | 1.2%                             | 1.8%                            | 4.7 |
| <b>Rural Urban Commuting Area (RUCA)</b>                  |                                  |                                 |     |
| Urban                                                     | 73.0%                            | 71.5%                           | 3.4 |
| Large rural                                               | 14.6%                            | 14.1%                           | 1.4 |
| Small rural                                               | 8.4%                             | 9.5%                            | 4.0 |
| Isolated                                                  | 4.1%                             | 4.9%                            | 4.1 |
| <b>Well-child visits<sup>a</sup></b>                      |                                  |                                 |     |
| 1 <sup>st</sup> quartile ( 0- 5)                          | 14.7%                            | 14.8%                           | 0.5 |
| 2 <sup>nd</sup> quartile ( 6- 7)                          | 34.6%                            | 33.5%                           | 2.4 |
| 3 <sup>rd</sup> quartile ( 8- 8)                          | 27.9%                            | 29.0%                           | 2.5 |
| 4 <sup>th</sup> quartile ( 9-15)                          | 22.8%                            | 22.6%                           | 0.5 |
| <b>County total Medicaid-serving dentists<sup>b</sup></b> |                                  |                                 |     |
| 1 <sup>st</sup> quintile ( 0- 5)                          | 17.1%                            | 19.2%                           | 5.4 |
| 2 <sup>nd</sup> quintile ( 6-10)                          | 16.3%                            | 16.8%                           | 1.5 |
| 3 <sup>rd</sup> quintile (11-16)                          | 17.5%                            | 16.7%                           | 2.3 |
| 4 <sup>th</sup> quintile (17-27)                          | 22.6%                            | 21.1%                           | 3.7 |
| 5 <sup>th</sup> quintile (64-74)                          | 26.5%                            | 26.2%                           | 0.6 |
| <b>Year of birth</b>                                      |                                  |                                 |     |
| 2007                                                      | 16.7%                            | 17.3%                           | 1.5 |
| 2008                                                      | 59.5%                            | 57.8%                           | 3.5 |
| 2009                                                      | 23.8%                            | 24.9%                           | 2.7 |

**eTable 2. Comparison of Propensity-score Matched Children Receiving High Frequency (≥4 Visits) Primary Care Provider-delivered Preventive Dental Care and Those With 1-3 Visits**

|                                                           | Primary Care Provider-delivered Care |                               |     |
|-----------------------------------------------------------|--------------------------------------|-------------------------------|-----|
|                                                           | 1-3 Preventive Visits<br>n=180       | 4+ Preventive Visits<br>n=180 | SMD |
| <b>Male</b>                                               | 57.2%                                | 57.2%                         | 0.0 |
| <b>Race/Ethnicity</b>                                     |                                      |                               |     |
| Black                                                     | 46.7%                                | 48.9%                         | 7.9 |
| White                                                     | 43.3%                                | 39.4%                         | 4.4 |
| Latino                                                    | 8.3%                                 | 9.4%                          | 3.9 |
| Other                                                     | 1.7%                                 | 2.2%                          | 4.0 |
| <b>Rural Urban Commuting Area (RUCA)</b>                  |                                      |                               |     |
| Urban                                                     | 69.4%                                | 68.3%                         | 2.4 |
| Large rural                                               | 8.9%                                 | 9.4%                          | 1.9 |
| Small rural                                               | 16.7%                                | 16.7%                         | 0.0 |
| Isolated                                                  | 5.0%                                 | 5.6%                          | 2.5 |
| <b>Well-child visits<sup>a</sup></b>                      |                                      |                               |     |
| 1 <sup>st</sup> quartile ( 3- 6)                          | 13.9%                                | 13.3%                         | 1.6 |
| 2 <sup>nd</sup> quartile ( 7- 7)                          | 34.4%                                | 32.2%                         | 4.7 |
| 3 <sup>rd</sup> quartile ( 8- 8)                          | 33.9%                                | 33.9%                         | 0.0 |
| 4 <sup>th</sup> quartile ( 9-12)                          | 17.8%                                | 20.6%                         | 7.0 |
| <b>County total Medicaid-serving dentists<sup>b</sup></b> |                                      |                               |     |
| 1 <sup>st</sup> quintile ( 0- 3)                          | 33.3%                                | 36.7%                         | 7.0 |
| 2 <sup>nd</sup> quintile ( 4-5)                           | 17.2%                                | 16.7%                         | 1.5 |
| 3 <sup>rd</sup> quintile ( 9-12)                          | 12.2%                                | 12.2%                         | 0.0 |
| 4 <sup>th</sup> quintile (13-13)                          | 15.6%                                | 13.3%                         | 6.3 |
| 5 <sup>th</sup> quintile (14-25)                          | 21.7%                                | 21.1%                         | 1.4 |
| <b>Year of birth</b>                                      |                                      |                               |     |
| 2007                                                      | 4.4%                                 | 3.9%                          | 2.8 |
| 2008                                                      | 54.4%                                | 56.7%                         | 4.5 |
| 2009                                                      | 41.1%                                | 39.4%                         | 3.4 |
